# Supplementary material for: Dosing 225Ac-DOTATOC in patients with somatostatin-receptor-positive solid tumors: 5-year follow-up of hematological and renal toxicity
Source: Springer Nature journal article supplement (doi:10.1007/s00259-021-05474-1), 2021-08-26
Supplement: MOESM1 [file 19601702]

## Supplement Table 1: Detailed patient characteristics

| Pt.-No. | Age | Histological Diagnosis          | Metastasis (UICC abbr.) | Previous Pharmacological Therapies ( <i>italicized: after TAT, during kidney follow-up</i> ) | Previous PRRT Y-90/Lu-177/ Bi-213 [GBq] |
|---------|-----|---------------------------------|-------------------------|----------------------------------------------------------------------------------------------|-----------------------------------------|
| 1       | 85  | Gastric-NET G2 (Ki67 10%)       | hep, oss                |                                                                                              | 8 / 8 / 0                               |
| 2       | 60  | Gastric-NEC G3 (Ki67 30%)       | hep, oss                | Carbo/Eto                                                                                    | 6 / 12 / 0                              |
| 3       | 62  | Midgut-NET                      | hep, oss                | SSA                                                                                          | 0 / 0 / 0                               |
| 4       | 73  | Midgut-NET                      | lym, oss, hep           | SSA, Eve                                                                                     | 16 / 20 / 0                             |
| 5       | 53  | Midgut-NET                      | lym, per                | SSA                                                                                          | 0 / 0 / 0                               |
| 6       | 58  | Midgut-NET G2 (Ki67 15%)        | lym, hep, oss, per      | SSA, INF                                                                                     | 0 / 0 / 0                               |
| 7       | 65  | Midgut-NET G2 (Ki67 15%)        | lym, hep, oss           | SSA, Deno                                                                                    | 6 / 4 / 0                               |
| 8       | 73  | Midgut-NET G2 (Ki-67 6%)        | lym, hep, oss           | SSA, Deno                                                                                    | 12 / 0 / 0                              |
| 9       | 66  | Hindgut-NET                     | hep, oss                | SSA, <i>Tem/Cap</i>                                                                          | 0 / 0 / 0                               |
| 10      | 52  | Hindgut-NET G2 (10%)            | lym, hep, oss           |                                                                                              | 10 / 6 / 0                              |
| 11      | 56  | p-NET                           | hep, oss, lym           |                                                                                              | 0 / 15 / 0                              |
| 12      | 49  | p-NET                           | lym, hep, oss           | SSA, STZ/Doxo, Sun, Eve, Oxa/5-FU, SIRT                                                      | 11 / 1 / 0                              |
| 13      | 56  | p-NET                           | hep, oss                | SSA, <i>Tem/Cap</i> , Sun, Eve                                                               | 0 / 44 / 0                              |
| 14      | 55  | p-NET G2 (Ki-67 10%)            | oss, hep                | SSA, Eve, SIRT, STZ/5-FU                                                                     | 12 / 20 / 0                             |
| 15      | 61  | p-NET G2 (Ki-67 10%)            | hep, oss, adr           | SSA                                                                                          | 22 / 12 / 13                            |
| 16      | 56  | p-NET G2 (Ki-67 15%)            | lym, oss, hep           | STZ/5-FU,                                                                                    | 6 / 24 / 0                              |
| 17      | 64  | p-NET G2 (Ki67 18%)             | hep, oss, pulm          | STZ/5-FU, Eve, Sun                                                                           | 8 / 6 / 0                               |
| 18      | 69  | p-NET G2(Ki-67 18%)             | lym, hep                | SSA, Sun                                                                                     | 18 / 4 / 19                             |
| 19      | 17  | p-NET G3 (Ki-67 30%)            | lym, hep, per           | <i>Tem/Thal</i> , SSA, Sun                                                                   | 6 / 19 / 0                              |
| 20      | 47  | p-NET G3 (Ki-67 30%)            | hep                     | SSA, <i>STZ/5-FU, Tem/Cap/Bev, Cis/Eto, Eve, FOLFIRI/Bev/Nivo</i>                            | 6 / 12 / 0                              |
| 21      | 73  | p-NEC (Ki-67 25%)               | hep, oss                | <i>Cis/Eto</i> , Topo, SIRT                                                                  | 10 / 4 / 0                              |
| 22      | 47  | p-NEC (Ki-67 30%)               | hep, oss                |                                                                                              | 6 / 4 / 0                               |
| 23      | 67  | atyp lung carcinoid             | hep                     | SSA                                                                                          | 2 / 12 / 0                              |
| 24      | 34  | atyp lung carcinoid (Ki-67 10%) | hep, oss                | SSA, Doxo/Vinciri/Cyclo, Eve                                                                 | 14 / 16 / 15                            |
| 25      | 65  | atyp lung carcinoid (Ki-67 10%) | lym, hep, oss           | Carbo/Eto, SIRT                                                                              | 0 / 30 / 0                              |
| 26      | 58  | atyp lung carcinoid (Ki-67 20%) | oss                     | SSA                                                                                          | 4 / 0 / 0                               |
| 27      | 72  | atyp lung carcinoid (Ki-67 8%)  | hep, oss                |                                                                                              | 0 / 0 / 4                               |
| 28      | 72  | Lung-LCNEC (Ki-67 60%)          | lym, oss, hep           |                                                                                              | 14 / 6 / 0                              |
| 29      | 51  | CUP-NET G2 (Ki-67 15%)          | lym, hep, oss, oth      | SSA, TACE, FOLFOX, Eve, <i>Sun</i>                                                           | 16 / 8 / 0                              |
| 30      | 63  | CUP-NET G1                      | oss, hep                |                                                                                              | 0 / 0 / 0                               |
| 31      | 58  | CUP-NET G2                      | lym, hep, oss           |                                                                                              | 0 / 18 / 0                              |
| 32      | 71  | CUP-NET G3 (Ki-67 25%)          | hep, oss                | SSA                                                                                          | 6 / 14 / 0                              |
| 33      | 61  | Medullary thyroid carcinoma     | oss                     | Van                                                                                          | 0 / 0 / 0                               |
| 34      | 52  | Medullary thyroid carcinoma     | pulm, oss               |                                                                                              | 0 / 6 / 0                               |
| 35      | 55  | Meningeoma atyp. (WHO II)       |                         |                                                                                              | 0 / 0 / 0                               |
| 36      | 38  | Merkel-cell carcinoma           | pulm, pleu, per         | Carbo/Eto, Pac, Ave                                                                          | 3 / 15 / 0                              |
| 37      | 40  | Paraganglioma                   | oss, oth                | <i>Cis/Eto</i> , Cyclo/Vinciri/DTIC, Sun                                                     | 2 / 2 / 0                               |
| 38      | 66  | Prostate-NET (Ki-67 10%)        | hep, oss                | SSA, Eve, Deno                                                                               | 6 / 12 / 4                              |
| 39      | 42  | Renal-NET G2 (Ki-67 5%)         | lym, hep, oss           | SSA, INF, Deno                                                                               | 0 / 22 / 0                              |

SSA Somatostatin-Analogue, Eve Everolimus, Sun Sunitinib, STZ Streptozocin, 5-FU 5-Fluorouracil, Doxo Doxorubicin, Tem Temozolomide, Cap Capecitabine, Thal Thalidomide, Cis Cisplatin, Carbo Carboplatin, Oxa Oxaliplatin, Eto Etoposide, Topo Topotecan, Vincri Vincristin, Cyclo Cyclophosphamide, Deno Denosumab, INF Interferon, SIRT Selective Internal Radiotherapy, Van Vandetanib, Ave Avelumab, Pac Paclitaxel, DTIC Dacarbacin, FOLFOX Oxa+5-FU, , FOLFIRI Irinotecan+5-FU, TACE Trans-Arterial Chemo-Embolization; NET Neuroendocrine Tumor, NEC Neuroendocrine Carcinoma, CUP Carcinoma of unknown primary, p-NET pancreatic NET

## Supplement Table 2: Individual risk-factors regarding Chronic Kidney Disease (CKD)

| Pt.-No. | Gender | CKD risk factors                                                                               | Estimated kidney pre-dose [Gy]* |
|---------|--------|------------------------------------------------------------------------------------------------|---------------------------------|
| 1       | f      | age >65, diabetes, hypertension, bisphosphonates                                               | 22                              |
| 2       | m      | CVD (septum defect), hypertension, ntCTX                                                       | 21                              |
| 3       | m      | hypertension                                                                                   | 0                               |
| 4       | m      | age >65, hypertension, carcinoid syndrom, targetedCTX                                          | 48                              |
| 5       | m      | carcinoid syndrom                                                                              | 0                               |
| 6       | f      | diabetes, hypertension, BMI >30, NSAID                                                         | 0                               |
| 7       | f      | age >65, CVD (tricuspidal+mitral insuff.), carcinoid syndrom, Deno                             | 15                              |
| 8       | m      | age >65, CVD (tricuspidal+mitral replacement), carcinoid syndrom, hypertension, diabetes, Deno | 25                              |
| 9       | m      | age >65, CVD (ICD, infarction, EF 43%), hypertension                                           | 0                               |
| 10      | m      | hypertension                                                                                   | 25                              |
| 11      | m      | -                                                                                              | 11                              |
| 12      | f      | CVD (septum defect), ntCTX                                                                     | 24                              |
| 13      | m      | ntCTX, targetedCTX                                                                             | 31                              |
| 14      | f      | ntCTX (breast cancer), bisphosphonates                                                         | 39                              |
| 15      | f      | bisphosphonates                                                                                | 77                              |
| 16      | f      | hypertension, ntCTX                                                                            | 29                              |
| 17      | f      | ntCTX                                                                                          | 21                              |
| 18      | m      | age >65, hypertension, targetedCTX                                                             | 73                              |
| 19      | f      | targetedCTX                                                                                    | 26                              |
| 20      | m      | ntCTX                                                                                          | 21                              |
| 21      | f      | age >65, ntCTX, NSAID                                                                          | 24                              |
| 22      | m      | -                                                                                              | 15                              |
| 23      | m      | age >65, diabetes, hypertension, bisphosphonates                                               | 13                              |
| 24      | f      | carcinoid syndrom, ntCTX                                                                       | 66                              |
| 25      | m      | age >65, ntCTX                                                                                 | 21                              |
| 26      | f      | hypertension                                                                                   | 8                               |
| 27      | m      | age >65, hypertension, CVD                                                                     | 7                               |
| 28      | m      | age >65, hypertension                                                                          | 34                              |
| 29      | f      | ntCTX, targetedCTX                                                                             | 39                              |
| 30      | m      | hypertension, CVD                                                                              | 0                               |
| 31      | m      | hypertension, BMI >30                                                                          | 13                              |
| 32      | m      | age >65, hypertension, CVD, targetedCTX                                                        | 22                              |
| 33      | m      | hypertension, CVD                                                                              | 0                               |
| 34      | m      | bisphosphonates                                                                                | 4                               |
| 35      | f      | -                                                                                              | 0                               |
| 36      | m      | ntCTX                                                                                          | 17                              |
| 37      | f      | bisphosphonates, ntCTX, targetedCTX,                                                           | 6                               |
| 38      | m      | age >65, bisphosphonates, NSAID, targetedCTX                                                   | 28                              |
| 39      | m      | bisphosphonates, hypertension, s/p nephrectomy                                                 | 15                              |

*CVD cardio-vascular-disease, NSAID >6 mo chronic intake of non-steroidal anti-inflammatory drugs, BMI body-mass-index, ntCTX chemo-therapy with known clinically relevant nephrotoxicity (e.g. platin), targetedCTX (no acute, but potentially indirect nephrotoxic potential of VEGF, mTOR or neoangiogenesis inhibitors)*

*\*For patients without individual dose estimates for previous PRRT, a replacement dose assuming 0.7 Gy/GBq <sup>177</sup>Lu-DOTATOC, 2.1 Gy/GBq <sup>90</sup>Y-DOTATOC or 1.6 Gy /GBq <sup>213</sup>Bi-DOTATOC was used.*

**Supplement Table 3: Sum activity of <sup>225</sup>Ac-DOTATOC, fractioning and follow-up period**

| <b>Pt.-<br/>No.*</b> | <b>Ac-225 sum<br/>[MBq]</b> | <b>1. AcPRRT<br/>[MBq]</b> | <b>IBC<br/>[mo]</b> | <b>2. AcPRRT<br/>[MBq]</b> | <b>IBC<br/>[mo]</b> | <b>3. AcPRRT<br/>[MBq]</b> | <b>IBC<br/>[mo]</b> | <b>4. AcPRRT<br/>[MBq]</b> | <b>IBC<br/>[mo]</b> | <b>5. AcPRRT<br/>[MBq]</b> | <b>Follow-up<br/>[mo]</b> |
|----------------------|-----------------------------|----------------------------|---------------------|----------------------------|---------------------|----------------------------|---------------------|----------------------------|---------------------|----------------------------|---------------------------|
| 22                   | 6                           | 6                          |                     |                            |                     |                            |                     |                            |                     |                            | 3                         |
| 19                   | 7                           | 7                          |                     |                            |                     |                            |                     |                            |                     |                            | >83                       |
| 32                   | 10                          | 10                         |                     |                            |                     |                            |                     |                            |                     |                            | 5                         |
| 12                   | 18                          | 12                         | 2                   | 6                          |                     |                            |                     |                            |                     |                            | 20                        |
| 21                   | 24                          | 12                         | 14                  | 12                         |                     |                            |                     |                            |                     |                            | 24                        |
| 28                   | 58                          | 18                         | 4                   | 40                         |                     |                            |                     |                            |                     |                            | 4                         |
| 29                   | 58                          | 18                         | 4                   | 40                         |                     |                            |                     |                            |                     |                            | 12                        |
| 7                    | 38                          | 19                         | 2                   | 19                         |                     |                            |                     |                            |                     |                            | 73                        |
| 10                   | 19                          | 19                         |                     |                            |                     |                            |                     |                            |                     |                            | >83                       |
| 20                   | 19                          | 19                         |                     |                            |                     |                            |                     |                            |                     |                            | 29                        |
| 26                   | 38                          | 19                         | 6                   | 19                         |                     |                            |                     |                            |                     |                            | 61                        |
| 30                   | 74                          | 19                         | 6                   | 19                         | 6                   | 19                         | 6                   | 19                         |                     |                            | >73                       |
| 36                   | 37                          | 19                         | 2                   | 19                         |                     |                            |                     |                            |                     |                            | 4                         |
| 38                   | 38                          | 19                         | 6                   | 19                         |                     |                            |                     |                            |                     |                            | 20                        |
| 39                   | 57                          | 19                         | 4                   | 19                         | 6                   | 19                         |                     |                            |                     |                            | 44                        |
| 4                    | 20                          | 20                         |                     |                            |                     |                            |                     |                            |                     |                            | 15                        |
| 5                    | 40                          | 20                         | 4                   | 20                         |                     |                            |                     |                            |                     |                            | 15                        |
| 15                   | 20                          | 20                         |                     |                            |                     |                            |                     |                            |                     |                            | 13                        |
| 18                   | 20                          | 20                         |                     |                            |                     |                            |                     |                            |                     |                            | 25                        |
| 25                   | 91                          | 20                         | 4                   | 20                         | 4                   | 13                         | 6                   | 20                         | 8                   | 19                         | 27                        |
| 16                   | 24                          | 24                         |                     |                            |                     |                            |                     |                            |                     |                            | 1                         |
| 6                    | 75                          | 25                         | 4                   | 25                         | 4                   | 25                         |                     |                            |                     |                            | 14                        |
| 11                   | 50                          | 25                         | 4                   | 25                         |                     |                            |                     |                            |                     |                            | 42                        |
| 13                   | 74                          | 25                         | 4                   | 25                         | 6                   | 24                         |                     |                            |                     |                            | 11                        |
| 33                   | 25                          | 25                         |                     |                            |                     |                            |                     |                            |                     |                            | 7                         |
| 34                   | 25                          | 25                         |                     |                            |                     |                            |                     |                            |                     |                            | >77                       |
| 35                   | 49                          | 25                         | 4                   | 24                         |                     |                            |                     |                            |                     |                            | 69                        |
| 17                   | 49                          | 30                         | 4                   | 19                         |                     |                            |                     |                            |                     |                            | 10                        |
| 14                   | 59                          | 33                         | 2                   | 26                         |                     |                            |                     |                            |                     |                            | 14                        |
| 2                    | 35                          | 35                         |                     |                            |                     |                            |                     |                            |                     |                            | 4                         |
| 31                   | 60                          | 35                         | 4                   | 25                         |                     |                            |                     |                            |                     |                            | 55                        |
| 8                    | 80                          | 40                         | 4                   | 40                         |                     |                            |                     |                            |                     |                            | 67                        |
| 23                   | 40                          | 40                         |                     |                            |                     |                            |                     |                            |                     |                            | 69                        |
| 1                    | 50                          | 50                         |                     |                            |                     |                            |                     |                            |                     |                            | 3                         |
| 9                    | 70                          | 50                         | 4                   | 20                         |                     |                            |                     |                            |                     |                            | >93                       |
| 27                   | 87                          | 50                         | 3                   | 19                         | 3                   | 16                         |                     |                            |                     |                            | 18                        |
| 37                   | 70                          | 50                         | 4                   | 20                         |                     |                            |                     |                            |                     |                            | 60                        |
| 3                    | 95                          | 55                         | 4                   | 40                         |                     |                            |                     |                            |                     |                            | 35                        |
| 24                   | 60                          | 60                         |                     |                            |                     |                            |                     |                            |                     |                            | 1                         |

IBC Interval between cycles

\* sorted by 1<sup>st</sup> cycle treatment radioactivity
